# Supplementary material for: Radiopharmaceuticals for PET and SPECT Imaging: A Literature Review over the Last Decade
Source: MDPI journal article supplement (doi:10.3390/ijms23095023), 2022-04-30
Supplement: s1 [file s1]

# Radiopharmaceuticals for PET and SPECT Imaging: A literature review over the last decade

George Crişan<sup>1,2</sup>, Nastasia Sanda Moldovean-Cioroianu<sup>1</sup>, Diana-Gabriela Timaru<sup>1</sup>, Gabriel Andrieş<sup>2</sup>, Călin Căinap<sup>3</sup>, and Vasile Chiş<sup>1,4,\*</sup>

<sup>1</sup> Faculty of Physics, Babeş-Bolyai University, Str. M. Kogălniceanu 1, RO-400084 Cluj-Napoca, Romania  
<sup>2</sup> Department of Nuclear Medicine, County Clinical Hospital, Clinicilor 3-5, Cluj-Napoca 40 0 0 06, Romania  
<sup>3</sup> The Oncology Institute "Prof. Dr. Ion Chiricuţă", Republicii 34-36, 400015 Cluj-Napoca, Romania  
<sup>4</sup> Institute for Research, Development and Innovation in Applied Natural Sciences, Babeş-Bolyai University, Str. Fântânele 30, RO-400327 Cluj-Napoca, Romania  
\* Correspondence: vasile.chis@ubbcluj.ro

**Table S1.** PET Radiopharmaceuticals used in oncology (references over the last ten years)

| Radiotracer                         | Disease                                                                                                                                    | Molecular target                                                           | Function                                                                                                     | Properties                                                                                                                                                               | Ref.                                 |
|-------------------------------------|--------------------------------------------------------------------------------------------------------------------------------------------|----------------------------------------------------------------------------|--------------------------------------------------------------------------------------------------------------|--------------------------------------------------------------------------------------------------------------------------------------------------------------------------|--------------------------------------|
| [methyl- <sup>11</sup> C]methionine | urinary, gynecological, liver and lung cancer                                                                                              | L-type amino acid transporter system and Na <sup>+</sup> -dependent system | imaging the rate of protein synthesis                                                                        | the short half-life of [ <sup>11</sup> C] limits the accessibility for PET scannings; [ <sup>11</sup> C]MET has been also widely used in various brain tumors            | [3], [17], [48] [49], [52-59], [500] |
| [ <sup>11</sup> C]CO                | wide applications in clinical research                                                                                                     | a variety of chemotypes (amides, ketones, acids, esters, and ureas)        | the production of a wide range of drug-like molecules and radioligands                                       | require the presence of transition metals (e.g. Pd) as reagents; poor solubility of in organic solvents and high dilution in inert gas                                   | [48], [55]                           |
| [ <sup>11</sup> C]acetate           | prostate cancer, hepatocellular carcinoma, lung cancer, nasopharyngeal carcinoma, renal cell carcinoma, bladder carcinoma and brain tumors | all over the body                                                          | tracer for cytoplasmic lipid synthesis (increased in tumours); measurements of myocardial oxygen consumption | acetate is a molecule recruited by cells to convert into acetyl-CoA by acetyl-CoA synthetase; rapidly picked-up by cells; originally employed in cardiology; salt vector | [60], [61-71]                        |
| [ <sup>11</sup> C]erlotinib         | cell lung carcinoma; colorectal cancer                                                                                                     | epidermal growth factor receptor                                           | tracing specific binding for activating mutations of the EGFR kinase                                         | small molecule vector; has the structure identical to the clinically used drug; [ <sup>11</sup> C]-erlotinib                                                             | [4], [72-74]                         |

## Supplementary Material

|                             |                                                                                        |                                                       |                                                                                     |                                                                                                                                                                                                         |                                                                           |
|-----------------------------|----------------------------------------------------------------------------------------|-------------------------------------------------------|-------------------------------------------------------------------------------------|---------------------------------------------------------------------------------------------------------------------------------------------------------------------------------------------------------|---------------------------------------------------------------------------|
|                             |                                                                                        |                                                       | domain                                                                              | accumulates in NSCLC tumors with activating kinase domain mutations                                                                                                                                     |                                                                           |
| [ <sup>11</sup> C]PD153035  | cell lung carcinoma; colorectal cancer                                                 | epidermal growth factor receptor                      | quantify EGFR expression                                                            | small molecule vector; large differences of the uptake levels in tumors                                                                                                                                 | [4], [445]                                                                |
| [ <sup>11</sup> C]choline   | prostate cancer                                                                        | phospholipid synthesis                                | tumor imaging; diagnostic agent                                                     | salt vector; as the proliferation of cancer cells gets higher, tumor cells exhibit an increased rate of the radiotracer's uptake                                                                        | [4], [59]                                                                 |
| [ <sup>18</sup> F]F-choline | prostate cancer                                                                        | phospholipid synthesis                                | primary staging, biochemical recurrence                                             | salt vector; greater accuracy when compared to [ <sup>18</sup> F]FDG                                                                                                                                    | [32], [398], [399]                                                        |
| [ <sup>18</sup> F]FCH       | breast, thyroid, lung, brain, liver, prostate cancers                                  | cellular membrane phospholipids, primarily in cancers | tumor imaging agent for various types of tumors                                     | better than [ <sup>18</sup> F]FDG for PC and HCC detections; enters the cells through choline transporters, with accumulation in tumors due to malignancy-induced overexpression of choline kinase (CK) | [4], [399]                                                                |
| [ <sup>18</sup> F]FDOPA     | glioma, neuroendocrine tumors, prostate cancer                                         | amino acid transport; a multiple-target molecule      | image a large variety of neuroendocrine tumors and pancreatic beta-cell hyperplasia | amino acid vector; good modality for detection of persistent and residual medullary thyroid cancer                                                                                                      | [4], [197]                                                                |
| [ <sup>18</sup> F]FDG       | neoplasm                                                                               | glucose metabolism                                    | tracer used for detection, staging and management of many types of cancer           | [ <sup>18</sup> F]-FDG avidly accumulates in poorly proliferating and hypoxic cancer cells, but low in proliferating cancer cells                                                                       | [17], [27], [33], [35], [38], [61], [117], [373], [390], [459-461], [500] |
| [ <sup>18</sup> F]FLT       | solid malignancies; multiple tumors (breast, rectal, gastric, pancreatic, oesophageal) | all over the body; thymidine kinase                   | tumor detection, staging, restaging, and response assessment to treatment, and      | nucleoside vector; has been introduced for imaging tumor cell proliferation; it is monophosphorylated by thymidine kinase 1                                                                             | [19], [20], [27], [400]                                                   |

## Supplementary Material

|                                                    |                                                                                                                      |                                                                                                                                                                    |                                                                                                                                                                     |                                                                                                                                                                                                                                                                               |                             |
|----------------------------------------------------|----------------------------------------------------------------------------------------------------------------------|--------------------------------------------------------------------------------------------------------------------------------------------------------------------|---------------------------------------------------------------------------------------------------------------------------------------------------------------------|-------------------------------------------------------------------------------------------------------------------------------------------------------------------------------------------------------------------------------------------------------------------------------|-----------------------------|
|                                                    | cancers, non-Hodgkin lymphoma)                                                                                       |                                                                                                                                                                    | visualises cellular proliferation                                                                                                                                   | (TK1), which leads to intracellular trapping; able to evaluate tumor heterogeneity, DNA replication                                                                                                                                                                           |                             |
| [ <sup>18</sup> F]FMISO                            | neck, lung, breast, brain pancreatic, cervical cancer                                                                | various target localizations of tumor hypoxia                                                                                                                      | determining the duration of survival without relapses ; predicting the radiotherapy efficiency malignant tumors;                                                    | the most established agent for assessing hypoxia and has been used for cancer imaging over the past 30 years for glioblastoma multiforme, non-small-cell lung cancer, and head and neck tumors                                                                                | [4], [22], [23], [29], [30] |
| [ <sup>18</sup> F]NaF                              | metastatic stages of various <i>cancers</i> and predictor of <i>myocardial</i> infarction                            | N.A.                                                                                                                                                               | detection of benign and malignant osseous abnormalities; bone remodeling; also used for the assessment of active calcification processes in coronary artery disease | it represents the bone-seeking PET radiotracer; considered as an excellent substitute for traditionally used <sup>99m</sup> Tc-labeled tracers; has favorable pharmacokinetics: high bone uptake, minimal binding to serum proteins, and fast clearance from the soft tissues | [4], [31]                   |
| [ <sup>18</sup> F]FGln                             | glioma, prostate, breast and thyroid cancer                                                                          | glutamine-targeting metabolic tracer                                                                                                                               | particularly suitable for intracranial gliomas imaging                                                                                                              | testing its ability to image other types of cancers is ongoing                                                                                                                                                                                                                | [4]                         |
| [ <sup>18</sup> F]FSPG                             | hepatocellular carcinomas, intracranial malignancies, head and neck cancers, colorectal cancer, non-Hodgkin lymphoma | taken up by cells through the system xC-transporter *                                                                                                              | detection and diagnostic tracer; high uptake in both small animal and human studies of intracranial malignancies                                                    | has the ability to identify drug-resistance by detecting upregulated antioxidant pathways and provides indicators of tumor response to treatment;                                                                                                                             | [4], [16]                   |
| [ <sup>18</sup> F]FACBC<br>[ <sup>18</sup> F]FACPC | prostate carcinoma, breast cancer                                                                                    | increased flow into tumor cells <i>via</i> amino acid transporters: alanine-serine-cysteine transporter 2 (ASCT2) and large neutral amino acid transporter (LAT-1) | prediction of prostate cancer aggressiveness; breast tumor imaging for detection of locoregional and distant spread;                                                | greater activity in malignant versus benign etiology; aminoacid vectors; diagnostic assessment and neurosurgery of gliomas                                                                                                                                                    | [4], [16]                   |

## Supplementary Material

|                                                                                                                                                                            |                                                            |                                                                                         |                                                                          |                                                                                                                                         |                    |
|----------------------------------------------------------------------------------------------------------------------------------------------------------------------------|------------------------------------------------------------|-----------------------------------------------------------------------------------------|--------------------------------------------------------------------------|-----------------------------------------------------------------------------------------------------------------------------------------|--------------------|
| [ <sup>18</sup> F]FDHT                                                                                                                                                     | prostate cancer                                            | androgen receptors                                                                      | a promising prognostic and diagnostic/predictive biomarker               | hormone vector; can identify increased AR expression in high-grade glioma;                                                              | [4], [21], [23]    |
| [ <sup>18</sup> F]ML-10<br>[ <sup>18</sup> F]ICMT-11                                                                                                                       | glioblastoma multiforme, breast cancer, lung cancer        | apoptotic cells                                                                         | assessment of apoptosis early after treatment                            | small molecule vectors; the apoptosis response of intracranial tumor                                                                    | [4]                |
| [ <sup>18</sup> F]BMS-986192                                                                                                                                               | cell lung carcinoma                                        | programmed death-ligand 1                                                               | quantify PD-L1 expression in non-small-cell lung cancer                  | adnectin vector                                                                                                                         | [149],[342], [365] |
| [ <sup>18</sup> F]PSMA-1007<br>[ <sup>18</sup> F]DCFPyL<br>[ <sup>18</sup> F]rhPSMA-7                                                                                      | prostate cancer                                            | prostate-specific membrane antigen                                                      | bone and soft tissue metastases from prostate cancer                     | peptidomimetic vectors; reliably detects malignant lymph nodes and has an exceptional specificity of more than 99% for nodal metastases | [4], [32], [99]    |
| [ <sup>18</sup> F]PARPi                                                                                                                                                    | head and neck cancer                                       | poly(ADP-ribose) polymerase 1                                                           | DNA repair marker; it accumulates mostly in the nuclei of tumor cells    | small molecule vector; it provides high-contrast images compared to [ <sup>18</sup> F]FDG                                               | [39-42]            |
| [ <sup>18</sup> F]FP-R01-MG-F2<br>[ <sup>18</sup> F]F- $\alpha$ v $\beta$ 6-BP                                                                                             | head and neck cancer, lung, colorectal, breast, pancreatic | integrin $\alpha$ v $\beta$ 6                                                           | targeting the cancer-associated integrin $\alpha$ v $\beta$ 6            | significant uptake in both the primary lesion and metastases, including metastasis to brain, bone, liver and lung                       | [4]                |
| [ <sup>18</sup> F]F-Galacto-RGD<br>[ <sup>18</sup> F]F-RGD-K5<br>[ <sup>18</sup> F]F-fluciclatide<br>Al[ <sup>18</sup> F]F-alfatide-I<br>Al[ <sup>18</sup> F]F-alfatide-II | solid malignancies; across multiple tumor types            | integrin $\alpha$ v $\beta$ 3 expressed by macrophages and angiogenic endothelial cells | markers of plaque inflammation and, potentially, of plaque vulnerability | peptide vectors; tracers binding specifically to $\alpha$ v $\beta$ 3                                                                   | [4]                |
| [ <sup>18</sup> F]EF5<br>[ <sup>18</sup> F]FAZA<br>[ <sup>18</sup> F]HX4                                                                                                   |                                                            | target the mitochondrial complex I and intratumor oxygen levels                         | detection of hypoxia;                                                    | small molecule vectors; can predict the response of tumors to single fraction radiation treatment                                       | [22-29]            |
| [ <sup>18</sup> F]-BAY864367                                                                                                                                               | prostate cancer, breast cancer, glioma                     | gastrin-releasing peptide receptor                                                      | gastrin-releasing-peptide receptor imaging                               | peptide vector; bombesin analogue tracer                                                                                                | [4], [23]          |
| [ <sup>18</sup> F]FDGal                                                                                                                                                    | hepatocarcinoma                                            | galactose                                                                               | N.A.                                                                     | small molecule vector                                                                                                                   | [4],               |

## Supplementary Material

|                                          |                                                             |                                                                                                                  |                                                                               |                                                                                                                          |                                              |
|------------------------------------------|-------------------------------------------------------------|------------------------------------------------------------------------------------------------------------------|-------------------------------------------------------------------------------|--------------------------------------------------------------------------------------------------------------------------|----------------------------------------------|
|                                          |                                                             | metabolism                                                                                                       |                                                                               |                                                                                                                          | [33-35]                                      |
| [ <sup>18</sup> F]afatinib               | lung carcinoma<br>colorectal cancer                         | epidermal growth<br>factor receptor                                                                              | detection of<br>EGFR positive<br>tumors                                       | small molecule                                                                                                           | [4], [117]                                   |
| [ <sup>124</sup> I]I-codrituzumab        | hepatocarcinoma                                             | glypican 3                                                                                                       | detects tumor<br>localization in<br>most patients<br>with HCC                 | antibody vector                                                                                                          | [4], [75],<br>[111]                          |
| [ <sup>124</sup> I]I-girentuximab        | renal cell<br>carcinoma                                     | carbonic anhydrase<br>9                                                                                          | discriminates<br>between clear-cell<br>RCC (ccRCC) and<br>non-ccRCC           | antibody vector                                                                                                          | [97]                                         |
| [ <sup>124</sup> I]I-huA33               | colorectal cancer                                           | specific to A33<br>glycoproteins                                                                                 | N.A.                                                                          | antibody vector                                                                                                          | [4], [92]                                    |
| [ <sup>64</sup> Cu]Cu-plerixafor         | hematological and<br>solid malignancies                     | C-X-C chemokine<br>receptor type 4                                                                               | N.A.                                                                          | small molecule                                                                                                           | [166]                                        |
| [ <sup>64</sup> Cu]Cu-CB-TE2A-<br>AR06   | prostate and breast<br>cancer                               | gastrin-releasing<br>peptide receptor                                                                            | N.A.                                                                          | peptide vector                                                                                                           | [165-167]                                    |
| [ <sup>64</sup> Cu]Cu-ATSM               | solid malignancies                                          | tumor hypoxia and<br>prognosis                                                                                   | imaging agent<br>targeting the<br>hypoxic regions<br>in tumors                | small molecule;<br>uptake region of<br>tumors associated<br>with upregulation of<br>DNA repair                           | [166], [168-<br>170], [171],<br>[174], [175] |
| [ <sup>64</sup> Cu]-PSMA                 | prostate cancer                                             | prostate-specific<br>membrane antigen                                                                            | diagnostic and<br>assessment of<br>residual disease                           | comparable<br>detection rates with<br>[ <sup>18</sup> F]-PSMA                                                            | [4], [164]                                   |
| [ <sup>64</sup> Cu]-DOTA-AE105           | breast, lung,<br>colorectal, prostate<br>and bladder cancer | a promising uPAR-<br>PET ligand in<br>several preclinical<br>validation studies;<br>peptide antagonists<br>AE105 | diagnostic/imagi<br>ng;<br>prognostic in<br>cancer invasion<br>and metastasis | first in-human use in<br>2013                                                                                            | [4], [166]                                   |
| [ <sup>68</sup> Ga]citrate               | prosthetic<br>joint/bone<br>infections,                     | N.A.                                                                                                             | diagnosis of bone<br>infection                                                | <sup>68</sup> Ga-citrate presents<br>many advantages<br>over <sup>67</sup> Ga for the<br>diagnosis of bone<br>infections | [4]                                          |
| [ <sup>68</sup> Ga]Ga-DOTA-SP            | glioma                                                      | neurokinin 1<br>receptor                                                                                         | N.A.                                                                          | peptide vector                                                                                                           | [4]                                          |
| [ <sup>68</sup> Ga]Ga-NOTA-<br>exendin-4 | insulinoma                                                  | glucagon-like<br>peptide<br>1 receptor                                                                           | detection of<br>increased GLP-1R<br>expressions;                              | also feasible in<br>patients with multiple<br>endocrine neoplasia                                                        | [177],<br>[181]                              |
| [ <sup>68</sup> Ga]Ga-NOTA-Aca-<br>BBN   | prostate cancer,<br>breast<br>cancer, glioma                | gastrin-releasing<br>peptide receptor                                                                            | for early<br>tumorigenesis                                                    |                                                                                                                          | [183]                                        |
| [ <sup>68</sup> Ga]Ga-HER2-<br>nanobody  | breast cancer                                               | epidermal growth<br>factor receptor 2                                                                            | nanobody<br>directed against                                                  | nanobody vector                                                                                                          | [184]                                        |

## Supplementary Material

| HER2                                                                                                                                                    |                                                               |                                                |                                                                       |                                                                                 |                                               |
|---------------------------------------------------------------------------------------------------------------------------------------------------------|---------------------------------------------------------------|------------------------------------------------|-----------------------------------------------------------------------|---------------------------------------------------------------------------------|-----------------------------------------------|
| [ <sup>68</sup> Ga]Ga-FAPI-04<br>[ <sup>68</sup> Ga]Ga-FAPI-21<br>[ <sup>68</sup> Ga]Ga-FAPI-46                                                         | solid malignancies                                            | fibroblast activation protein $\alpha$         | quinoline-based PET tracers; fibroblast-activation-protein inhibitors | small molecule vectors                                                          | [4]                                           |
| [ <sup>68</sup> Ga]Ga-ABY-025                                                                                                                           | breast cancer                                                 | epidermal growth factor receptor 2             | allows for the determination of HER2 expression heterogeneity         | affibody vector; overcomes disadvantages of samples from biopsies               | [184]                                         |
| [ <sup>68</sup> Ga]Ga-NeoBOMB1<br>[ <sup>68</sup> Ga]Ga-BBN-RGD<br>[ <sup>68</sup> Ga]Ga-RM26<br>[ <sup>68</sup> Ga]Ga-SB3<br>[ <sup>68</sup> Ga]Ga-RM2 | prostate and breast cancer, glioma                            | gastrin-releasing peptide receptor             | N.A.                                                                  | peptide vectors                                                                 | [4], [182]                                    |
| [ <sup>68</sup> Ga]PSMA-I&T<br>[ <sup>68</sup> Ga]PSMA-617<br>[ <sup>68</sup> Ga]PSMA-11                                                                | prostate cancer                                               | prostate-specific membrane antigen             | for increased PSMA expression                                         | peptidomimetic vectors: small proteins designed to mimic a peptide              | [10], [179]                                   |
| [ <sup>89</sup> Zr]Zr-DFO-HuMab-5B1                                                                                                                     | pancreatic and bladder cancer                                 | CA19-9 positive malignancies                   | accumulation of HuMab-5B1 in CA19-9 expressing tumors                 |                                                                                 | [90], [132]                                   |
|                                                                                                                                                         |                                                               |                                                |                                                                       | antibody vectors;                                                               |                                               |
|                                                                                                                                                         |                                                               |                                                |                                                                       | several of these tracers might provide individualized antibody-based treatment; |                                               |
| [ <sup>89</sup> Zr]Zr-DFO-MSTP2109A                                                                                                                     | prostate cancer                                               | transmembrane epithelial antigen of prostate-1 | a humanized IgG1 monoclonal antibody directed against STEAP1          |                                                                                 | [4], [113], [131], [153]                      |
| [ <sup>89</sup> Zr]Zr-girentuximab                                                                                                                      | renal cell carcinoma                                          | N.A.                                           | differentiation between ccRCC and non-ccRCC lesions                   | despite their specificity, efficacy has remained limited                        | [141]                                         |
| [ <sup>89</sup> Zr]Zr-bevacizumab                                                                                                                       | solid malignancies; particularly for malignant breast lesions | vascular endothelial growth factor receptor    | early detection; VEGF-A overexpression                                |                                                                                 | [4], [113], [118], [119], [121], [124], [145] |
| [ <sup>89</sup> Zr]Zr-atezolizumab                                                                                                                      | cell lung carcinoma, bladder cancer, breast cancer            | programmed death-ligand 1                      | clinical response to PD-L1 blockade in cancer                         |                                                                                 | [4], [134]                                    |

## Supplementary Material

|                                                                     |                                                     |                                             |                                                                                                                       |                                               |
|---------------------------------------------------------------------|-----------------------------------------------------|---------------------------------------------|-----------------------------------------------------------------------------------------------------------------------|-----------------------------------------------|
| <sup>[89]Zr</sup> Zr-cetuximab<br><sup>[89]Zr</sup> Zr-panitumumab  | lung carcinoma, colorectal cancer                   | epidermal growth factor receptor            | potential predictive biomarker for dosing strategy; novel immuno-PET tracers                                          | [4], [113], [127], [128], [116], [138], [140] |
| <sup>[89]Zr</sup> Zr-ipilimumab                                     | metastatic melanoma                                 | cytotoxic T-lymphocyte-associated protein 4 | monoclonal antibody targeting CTLA-4                                                                                  | [4], [113], [161]                             |
| <sup>[89]Zr</sup> Zr-Df-IAB22M2C                                    | melanoma, lung cancer, hepatocarcinoma              | CD8, CD20                                   | noninvasive imaging of CD8+ T cells                                                                                   | [113], [151]                                  |
| <sup>[89]Zr</sup> Zr-GSK2849330                                     | solid malignancies                                  | epidermal growth factor receptor 3          | target engagement of mAb to the HER3 receptor                                                                         | [4], [146]                                    |
| <sup>[89]Zr</sup> Zr-rituximab<br><sup>[89]Zr</sup> Zr-obinutuzumab | B cell lymphoma                                     | CD8, CD20                                   | noninvasively and quantitatively monitor CD20/CD8-expression; monitor lymph node and peribronchial increased activity | [4], [113], [129]                             |
| <sup>[89]Zr</sup> Zr-AMG 211                                        | gastrointestinal adenocarcinoma                     | carcinoembryonic antigen                    | accumulation in CD3-rich lymphoid tissues                                                                             | [4], [137]                                    |
| <sup>[89]Zr</sup> Zr-HuJ591                                         | (advanced metastatic) prostate cancer               | prostate-specific membrane antigen          | PSMA overexpression and localization of disease                                                                       | [103], [113]                                  |
| <sup>[89]Zr</sup> Zr-MMOT0530A                                      | pancreatic ductal adenocarcinoma and ovarian cancer | mesothelin **-tumor differentiation antigen | uptake in primary and metastatic PC and OC tumor lesions                                                              | [4], [113],[133]                              |

\* an amino acid antiporter that mediates the exchange of extracellular cystine and intracellular glutamate across the cellular membrane;

\*\* frequently overexpressed in pancreatic and ovarian cancers

N.A. not applicable or not available.

**Table S2.** PET Radiopharmaceuticals used in neurology (references over the last ten years)

| Radiotracer                            | Disease/ Molecular target                                                                                             | Function                                                                | Properties                                                                                                       | Ref.      |
|----------------------------------------|-----------------------------------------------------------------------------------------------------------------------|-------------------------------------------------------------------------|------------------------------------------------------------------------------------------------------------------|-----------|
| [ <sup>11</sup> C]MET                  | brain gliomas and metastases                                                                                          | differentiation of tumor regrowth; delineation of gliomas.              | the tracer's stability in its final formulation is not well documented in literature                             | [272]     |
| N-[ <sup>11</sup> C]-methyl-flumazenil | neuronal damages, epilepsy, stroke-induced penumbral, infarction and AD                                               | binds to the benzodiazepine sites of GABAA receptors                    | excellent kinetic properties for image quantification                                                            | [272]     |
| [ <sup>11</sup> C]raclopride           | psychiatric, PD, addiction, attention-deficit hyperactivity disorder, schizophrenia                                   | tracer for dopamine function in striatal cortex                         | most widely used PET radiotracer for measuring DA changes in dopamine rates at the synaptic level                | [272]     |
| [ <sup>11</sup> C]UCB-J                | targeting synaptic vesicle proteins SV2A; primary interest in epilepsy, or diseases associated with synaptic loss     | imaging SV2A expression in synaptic vesicles                            | leading SV2A tracer; good selectivity, fast kinetics                                                             | [275-280] |
| [ <sup>11</sup> C]BU99008              | targeting the imidazoline receptors I2BS; powerful tool in drug development and studies of neuropsychiatric disorders | imaging of I2BS distribution across the brain                           | the only tracer designed for I2BS in humans; good response in blocking studies; requires long scan times         | [281-284] |
| [ <sup>11</sup> C]ITMM                 | in cerebellar cortex; white matter<br><br>PD, addiction, epilepsy, neuropathic pain, and depression                   | targeting metabotropic glutamate receptors mGluR1                       | very good in vivo block responses, differences in cerebellar ataxia patients; low brain uptake and slow kinetics | [285-291] |
| [ <sup>11</sup> C]LY2795050            | AD, depression and addiction                                                                                          | targeting opioid receptors <i>k</i>                                     | good pharmacokinetics for imaging; good response for <i>in vivo</i> blocking; limited dynamic range              | [292-294] |
| [ <sup>11</sup> C]Cimbi-36             | AD, obsessive-compulsive disorder, Tourette's syndrome, schizophrenia                                                 | targeting serotonin 5-HT <sub>2</sub> ; high uptake in cortical regions | good response to in vivo blocking; moderately slow kinetics                                                      | [295-298] |
| [ <sup>11</sup> C]MK-3168              | pain, addiction, and Tourette syndrome                                                                                | fatty acid amide hydrolase associated receptors                         | slow kinetics and rapid metabolism in humans                                                                     | [312-314] |
| [ <sup>11</sup> C]Martinostat          | schizophrenia; cerebellum uptake;                                                                                     | CNS quantification of HDACs                                             | high brain uptake                                                                                                | [308-311] |



## Supplementary Material

|                                                               |                                                                                                                                                                     |                                                                                         |                                                                                                                                                                                                                              |                                  |
|---------------------------------------------------------------|---------------------------------------------------------------------------------------------------------------------------------------------------------------------|-----------------------------------------------------------------------------------------|------------------------------------------------------------------------------------------------------------------------------------------------------------------------------------------------------------------------------|----------------------------------|
| [ <sup>11</sup> C]PS13                                        | dysfunctions of enzymes within the CNS                                                                                                                              | imaging COX-1                                                                           | limited data available; low plasma free fraction, suitable kinetic profile                                                                                                                                                   | [299], [300], [322]              |
| [ <sup>11</sup> C]IMA-107                                     | HD, PD and schizophrenia                                                                                                                                            | study of PDE10A                                                                         | good selectivity; good response in HD patients, suitable pharmacokinetics                                                                                                                                                    | [272]                            |
| [ <sup>11</sup> C]Lu AE92686                                  | HD, schizophrenia                                                                                                                                                   | N.A.                                                                                    | high brain penetration                                                                                                                                                                                                       | [272]                            |
| [ <sup>11</sup> C]CURB (URB694)                               | targeting distribution of FAAH; high uptake in the cerebral cortex, cerebellum, and hippocampus                                                                     | FAAH tracer; promising pre-clinical blocking profiles in pre-clinical models and humans | very good response in blocking studies; irreversible kinetics                                                                                                                                                                | [272]                            |
| [ <sup>18</sup> F]FET                                         | brain tumor; does not serve as substrate to protein synthesis; glioma <sup>18</sup> F-FET uptake is not significantly influenced by changes in the BBB permeability | good diagnostic performance; highly specific for glioma                                 | evaluation of its applicability in non-clinical research is still lacking; overcomes known limitations of [ <sup>18</sup> F]FDG: increased uptake in inflammatory environment and elevated background signal in normal brain | [17]                             |
| [ <sup>18</sup> F]AV-1451<br>most published <i>tau</i> tracer | tau proteins (tauopathies), AD                                                                                                                                      | AD assessment; distinguishes between disease stages                                     | high selectivity over amyloid; fast kinetics                                                                                                                                                                                 | [217], [219], [223], [232],[237] |
| [ <sup>18</sup> F]THK 523, 5117,5317, 5351                    | uptake in the cerebellar cortex, neocortex, subcortical white matter, cerebellar grey matter                                                                        | distinguishes AD from healthy controls                                                  | only moderate selectivity over amyloids, high white matter retention; limited selectivity reported data                                                                                                                      | [239-243], [247], [250], [272]   |
| [ <sup>18</sup> F]MK-6240                                     | AD                                                                                                                                                                  | imaging neurofibrillary tangles                                                         | low bindings in healthy controls; strong correlation with cognitive AD scores                                                                                                                                                | [221], [318]                     |
| [ <sup>18</sup> F]PM-PBB3                                     | AD, cerebral accumulations of tau deposits                                                                                                                          | tau imaging                                                                             | lower binding in basal ganglia and thalamus when compared to [ <sup>11</sup> C]-PBB3                                                                                                                                         | [272], [253]                     |
| [ <sup>18</sup> F]FEOBV                                       | targeting cholinergic system; cerebellar grey matter, and striatum                                                                                                  | acetylcholine transporters and cholinergic synapses; studying degenerative conditions   | improved signal-to-noise over previous VACht tracers; but slow kinetics                                                                                                                                                      | [268], [272]                     |
| [ <sup>18</sup> F]MNI-444                                     | targeting adenosine system A <sub>2A</sub> ; cerebellum                                                                                                             | novel PET radiotracer for imaging A <sub>2A</sub>                                       | high selectivity; good pharmacokinetics; low background, slow                                                                                                                                                                | [273], [274], [311]              |

## Supplementary Material

| metabolism                                                                                                                                                             |                                                                          |                                                                         |                                                                    |                   |
|------------------------------------------------------------------------------------------------------------------------------------------------------------------------|--------------------------------------------------------------------------|-------------------------------------------------------------------------|--------------------------------------------------------------------|-------------------|
| [ <sup>18</sup> F]UCB-H                                                                                                                                                | targeting synaptic vesicle proteins SV2A; target has no reference region | binds specifically to the synaptic vesicle glycoprotein 2A              | lower sensitivity compared to [ <sup>11</sup> C]-UCB-J             | [276], [277]      |
| [ <sup>18</sup> F]FIMX                                                                                                                                                 | PD, addiction, epilepsy, neuropathic pain, and depression                | targeting metabotropic glutamate receptors mGluR1                       | very good in vivo block response; fast kinetics                    | [272]             |
| [ <sup>18</sup> F]JNJ-64413739                                                                                                                                         | purinoceptor P2X7                                                        | N.A.                                                                    | first P2X7-type of tracer; no suitable reference region            | [272]             |
| [ <sup>18</sup> F]BCPP-EF                                                                                                                                              | targeting mitochondrial complexes MC1                                    | quantitative imaging of MC-1 activity in the living brain               | high brain uptake, suitable kinetics, large dynamic range in vitro | [301-307]         |
| [ <sup>18</sup> F]MNI-654<br>[ <sup>18</sup> F]MNI-659                                                                                                                 | AD, HD                                                                   | characterizing adenosine receptors across multiple regions of the brain | suitable pharmacokinetics; significant response in HD              | [311]             |
| [ <sup>64</sup> Cu]Cu-SARTATE<br>[ <sup>68</sup> Ga]DOTA-TOC<br>[ <sup>68</sup> Ga]Ga-DOTA-NOC<br>[ <sup>68</sup> Ga]Ga-NODAGA-JR11<br>[ <sup>68</sup> Ga]Ga-DOTA-TATE | neuroendocrine tumors;                                                   | targeting somatostatin receptor 2                                       | peptide vectors                                                    | [4], [180], [272] |

N.A. not applicable or not available.

**Table S3.** PET Radiopharmaceuticals used in cardiology (references over the last ten years)

| Radiotracer                        | Disease                                            | Molecular target                      | Function                                                                                                                           | Properties                                                                                                                                        | Ref.                |
|------------------------------------|----------------------------------------------------|---------------------------------------|------------------------------------------------------------------------------------------------------------------------------------|---------------------------------------------------------------------------------------------------------------------------------------------------|---------------------|
| [ <sup>82</sup> Rb]chloride        | cardiac conditions                                 | cardiac tissue                        | diagnostic; monitoring the cardiac flow                                                                                            | capacity to accurately quantify MBF and a low delivered radiation exposure for a rest/stress test                                                 | [344]               |
| [ <sup>15</sup> O]H <sub>2</sub> O | myocardial perfusion, cerebral and tumor perfusion | N.A.                                  | tracer for quantitative measurement of cerebral blood flow                                                                         | the short half-life of <sup>15</sup> O results in the challenges in clinical use                                                                  | [345], [358], [359] |
| [ <sup>13</sup> N]NH <sub>3</sub>  | cardiovascular events, PC and encephalopathy       | myocardial tissue, liver, kidneys and | imaging agent for assessing regional blood flow in tissues; for elucidation of NH <sub>3</sub> metabolism in patients with hepatic | ammonia N13 enters the myocardium through the coronary arteries; well-validated radiotracer for clinical management; it is also used in PC due to | [329], [332-334],   |

## Supplementary Material

|                                         |                                                     |                                                        |                                                           |                                                                                                             |                               |
|-----------------------------------------|-----------------------------------------------------|--------------------------------------------------------|-----------------------------------------------------------|-------------------------------------------------------------------------------------------------------------|-------------------------------|
|                                         |                                                     | brain                                                  | encephalopathy;<br>potentially a tumor<br>imaging agent   | the up-regulation of NH <sub>3</sub><br>during glutamine synthesis<br>in tumors                             | [357]                         |
| [ <sup>15</sup> O]CO                    | cardiovascular<br>events                            | myocardial<br>tissue                                   | myocardial function                                       | the most common tracers<br>used for non-invasively<br>measuring oxygen<br>consumption and blood<br>volume   | [344]                         |
| [ <sup>18</sup> F]flurpiridaz           |                                                     | mitochondrial<br>complex I                             |                                                           | novel PET tracer                                                                                            | [342],<br>[343],<br>[363-366] |
| [ <sup>18</sup> F]FBnTP                 | myocardial<br>perfusion                             | mitochondrial<br>membrane                              | diagnostic/imaging                                        | rapid<br>myocardial uptake and<br>retention and high                                                        | [360]                         |
| [ <sup>18</sup> F]FTPP                  |                                                     | mitochondrial<br>membrane                              |                                                           | myocardium/liver,<br>myocardium/blood and                                                                   | [360],<br>[374]               |
| [ <sup>18</sup> F]FDHR                  |                                                     | mitochondrial<br>complex I                             |                                                           | myocardium/lung contrast<br>in animal studies;<br>few human studies reported<br>to date                     | [360],<br>[370]               |
| [ <sup>18</sup> F]FDM                   | atherosclerosis                                     | mannose<br>receptors                                   | progressive<br>inflammation in<br>atherosclerotic plaques | it is (mannose) an isomer of<br>glucose that is taken up by<br>macrophages through<br>glucose transporters; | [374]                         |
| [ <sup>18</sup> F]macroflor             | atherosclerosis                                     | macrophage-<br>targeted<br>polyglucose<br>nanoparticle | immunoimaging;<br>nanoparticle uptake                     | noninvasive assessment of<br>the immune system in<br>atherosclerosis;                                       | [375],<br>[402]               |
| [ <sup>64</sup> Cu]DOTA-<br>ECL1i       | lung<br>inflammation                                | chemokine<br>receptor type<br>2 (CCR2)                 | detection of CCR2-<br>directed inflammation               | sensitive and specific<br>detection of CCR2+ cells                                                          | [381-384]                     |
| [ <sup>64</sup> Cu]DOTA-<br>DAPTA-comb  | initiation and<br>progression of<br>atherosclerosis | chemokine<br>receptor<br>CCR5                          | specific imaging of<br>CCR5                               | nanomedicinal approach<br>towards cardiovascular<br>diseases                                                | [385]                         |
| [ <sup>68</sup> Ga]DOTATAT<br>E/DOTANOC | inflammatory<br>conditions related<br>to plaques    | N.A.                                                   | functional imaging of<br>plaques                          | increased uptakes in<br>coronary arteries and large<br>arteries;<br>comparable diagnostic<br>accuracy       | [387],<br>[388-392]           |

**Table S4.** PET Radiopharmaceuticals used in bacteria imaging (references over the last ten years)

| Radiotracer                               | Type of bacteria     | Properties                                                                      | Ref.  |
|-------------------------------------------|----------------------|---------------------------------------------------------------------------------|-------|
| * [ <sup>18</sup> F]FHM<br>(maltohexaose) | <i>S. aureus</i>     | better than FDG in differentiating non-infection<br>inflammation from infection | [413] |
| *[ <sup>18</sup> F]FDS (sorbitol)         | <i>K. pneumoniae</i> | better than FDG to detect lung infection from<br>inflammation                   | [423] |

## Supplementary Material

|                                                            |                                                         |                                                                                                                      |                 |
|------------------------------------------------------------|---------------------------------------------------------|----------------------------------------------------------------------------------------------------------------------|-----------------|
| *[ <sup>18</sup> F]maltotriose                             | N.A.                                                    | imaging bacterial infections in animals;<br>future applications in clinics                                           | [428]           |
| *[ <sup>18</sup> F]FDS                                     | <i>E.coli</i><br><i>Enterobacteriaceae</i>              | diagnosis and monitoring therapy;<br>diagnostic for infections                                                       | [422-424]       |
| *[ <sup>18</sup> F]FDG-6-P                                 | <i>S.aureus</i>                                         | potential to differentiate infection from inflammation                                                               | [419]           |
| *[ <sup>18</sup> F]isonicotinic acid                       | <i>M.tuberculosis</i>                                   | non-invasive approach to localize infectious foci;<br>tested only on mice                                            | [413]           |
| *[ <sup>18</sup> F]FIAU                                    | <i>E.coli</i><br><i>P.aeruginosa</i>                    | engineered pathogens for evaluating experimental<br>therapeutics                                                     | [413]           |
| *[ <sup>18</sup> F]PABA                                    | <i>S.aureus</i>                                         | non-invasive tool for detecting/localizing/monitoring<br>infections                                                  | [413]           |
| *[ <sup>68</sup> Ga]TAFC<br>*[ <sup>68</sup> Ga]FOX E      | <i>A.fumigatus</i>                                      | very promising for detection of infections with high<br>sensitivity                                                  | [413],<br>[420] |
| [ <sup>64</sup> Cu]ProT<br>(prothrombin)                   | <i>S.aureus</i>                                         | non-invasive detection with an analog of ProT                                                                        | [413]           |
| [ <sup>64</sup> Cu]JF5 mAb                                 | <i>A.fumigatus</i>                                      | localized aspergillus infection                                                                                      |                 |
| [ <sup>18</sup> F]maltose                                  | <i>E.coli</i>                                           | identifying drug resistance;<br>promising for bacterial infection imaging                                            | [426]           |
| [ <sup>18</sup> F]trimethoprim                             | <i>E.coli</i><br><i>P.aeruginosa</i><br><i>S.aureus</i> | infection imaging                                                                                                    | [427]           |
| [ <sup>68</sup> Ga]UBI-29-41                               | <i>S.aureus</i>                                         | non-toxic, identifies infectious foci in humans;<br>correlated with degree of infection<br>need further studies;     | [413-417]       |
| [ <sup>68</sup> Ga]UBI-31-38                               | <i>S.aureus</i>                                         | good localization of infection site;<br>promising results in humans                                                  | [414-417]       |
| [ <sup>68</sup> Ga]TBIA101<br>(depsidomycin<br>derivative) | <i>M. tuberculosis</i><br><i>S.aureus</i>               | imaging inflammation but not necessarily infection;<br>non-specific                                                  | [430],<br>[431] |
| [ <sup>124</sup> I]FIAU<br>(fialuridine)                   | <i>S.aureus</i>                                         | well tolerated but of limited value for detection of<br>prosthetic joint infection;<br>low image quality/specificity | [418]           |
| [ <sup>11</sup> C]PABA<br>(para-aminobenzoic<br>acid)      | <i>E.coli</i>                                           | imaging living bacteria in humans                                                                                    | [413]           |

\* novel tracers

N.A. not applicable or not available.

**Table S5.** The most promising SPECT radiopharmaceuticals that were evaluated in preclinical or clinical trials in the last decade.

SSTR and PSMA targeting radiopharmaceuticals have been the focus of research in the past decade. The versatility of technetium chemistry is seen in the variety of bifunctional chelators and technetium metal fragments used in synthesizing promising compounds for SPECT imaging of neuroendocrine tumors and prostate cancer.

| Radiotracer                                                | Disease               | Molecular Target       | Properties                                                                                                                                                                    | Ref.         |
|------------------------------------------------------------|-----------------------|------------------------|-------------------------------------------------------------------------------------------------------------------------------------------------------------------------------|--------------|
| $[^{99m}\text{Tc}(\text{I})]$ NOTA / NODAGA – sst2 - ANT   | neuroendocrine tumors | somatostatin receptors | $[^{99m}\text{Tc}(\text{CO})_3]^+$ core<br>NOTA / NODAGA bifunctional chelators<br>sst2-ANT – somatostatin receptor antagonist                                                | [512], [513] |
| $[^{99m}\text{Tc}(\text{V})]$ N4 – SS – 01                 | neuroendocrine tumors | somatostatin receptors | <i>trans</i> - $[\text{O} = \text{Tc} = \text{O}]^+$ core<br>[N4] – tetramino, tetradentate chelator<br>SS – 01 somatostatin receptor sst2 antagonist                         | [514]        |
| $[^{99m}\text{Tc}(\text{V})]$ TECANT - 1                   | neuroendocrine tumors | somatostatin receptors | <i>trans</i> - $[\text{O} = \text{Tc} = \text{O}]^+$ core<br>[N4] – tetramino, tetradentate chelator<br>LM3 - somatostatin receptor sst2 antagonist                           | [515]        |
| $[^{99m}\text{Tc}(\text{V})]$ EDDA / HYNIC – Ahx – SS - 01 | neuroendocrine tumors | somatostatin receptors | $[^{99m}\text{Tc}]$ -HYNIC core with EDDA as coligand<br>Ahx – spacer<br>SS – 01 somatostatin receptor sst2 antagonist<br>The presence of the spacer greatly increased uptake | [516]        |
| $[^{99m}\text{Tc}(\text{I})]$ MIP – 1404                   | prostate cancer       | PSMA                   | $[^{99m}\text{Tc}(\text{CO})_3]^+$ core<br>TIM chelator<br>Glutamate-urea-glutamate pharmacophore                                                                             | [522], [523] |
| $[^{99m}\text{Tc}(\text{V})]$ EDDA / HYNIC – iPSMA         | prostate cancer       | PSMA                   | $[^{99m}\text{Tc}]$ -HYNIC core with EDDA as coligand<br>Lys(NaI)-urea-Glu pharmacophore                                                                                      | [525 – 528]  |
| $[^{99m}\text{Tc}(\text{V})]$ O – N3S – PSMA – I&S         | prostate cancer       | PSMA                   | $[\text{Tc} \equiv \text{O}]^{3+}$ core<br>Mercaptoacetyl-triserine chelator<br>Lys-urea-Glu pharmacophore                                                                    | [529], [530] |

## Supplementary Material

|                                                               |                                 |                                  |                                                                                                                                                                                                                                                                                                                                                                                                                |             |
|---------------------------------------------------------------|---------------------------------|----------------------------------|----------------------------------------------------------------------------------------------------------------------------------------------------------------------------------------------------------------------------------------------------------------------------------------------------------------------------------------------------------------------------------------------------------------|-------------|
|                                                               |                                 |                                  | Found useful applications in radio-guided surgery.                                                                                                                                                                                                                                                                                                                                                             |             |
| $[^{99m}\text{Tc}(\text{V})]\text{HYNIC} - \text{ALUG}$       | prostate cancer                 | PSMA                             | $[^{99m}\text{Tc}]$ -HYNIC core with EDDA as coligand<br>6-hydrazinonicotinate – aminocaproic acid-lysine-urea-glutamate pharmacophore                                                                                                                                                                                                                                                                         | [524]       |
| $[^{123}\text{I}]\text{MIP} - 1074$                           | prostate cancer                 | PSMA                             | glutamate-urea heterodimer that inhibits the enzymatic activity of PSMA<br>high affinity and specificity<br>internalizes in prostate cancer cells that express PSMA                                                                                                                                                                                                                                            | [519 – 521] |
| $[^{99m}\text{Tc}(\text{V})]\text{maraciclalide}$             | breast, lung, prostate cancer   | $\alpha\text{v}\beta 3$ integrin | Cyclic, synthetic peptide containing the RGD motif, with high affinity for the $\alpha\text{v}\beta 3$ integrin                                                                                                                                                                                                                                                                                                | [533]       |
| $[^{99m}\text{Tc}(\text{V})]\text{3P4-RGD2}$                  | breast, lung, esophageal cancer | $\alpha\text{v}\beta 3$ integrin | Cyclic RGD dimer. The compound contains the PEG4 linker in order to improve the tumor uptake of the compound                                                                                                                                                                                                                                                                                                   | [534 – 540] |
| $[^{99m}\text{Tc}(\text{III})]\text{3SPboroxime}$             | various heart conditions        | passive diffusion                | Member of the BATO (boronic acid adducts of technetium dioximes) class of $[^{99m}\text{Tc}](\text{III})$ complexes.<br>Isostructural derivative of $[^{99m}\text{Tc}]$ -teboroxime, where the methyl group appended to the boronate cap was replaced by a sulfonyl group.<br>The new compound had similar initial heart uptake and delayed myocardial washout resulting in more favorable imaging properties. | [551 – 554] |
| $[^{99m}\text{Tc}(\text{V})]\text{N} - \text{MPO}$            | various heart conditions        | passive diffusion                | $[^{99m}\text{Tc}]\text{N}$ core was coordinated by the 2-mercaptopyridine oxide bidenate ligand in combination with biphosphine. The compound shows similar pharmacokinetic properties to currently used radiopharmaceuticals, but has better heart to liver ratio.                                                                                                                                           | [546]       |
| $[^{99m}\text{Tc}(\text{I})]\text{benzothiazole derivatives}$ | AD                              | $\beta$ – amyloid plaques        | Obtained by the replacement of the phenyl group in 2 – phenylbenzothiazole with the cyclopentadienyl tricarbonyl                                                                                                                                                                                                                                                                                               | [560]       |

|                                |                               |                                     |                                                                                                                                                                                                                       |           |
|--------------------------------|-------------------------------|-------------------------------------|-----------------------------------------------------------------------------------------------------------------------------------------------------------------------------------------------------------------------|-----------|
|                                |                               |                                     | Cp[ <sup>99m</sup> Tc](CO) <sub>3</sub> core. The compounds show impressive brain uptake and maintain the Aβ binding affinity of the 2-Arylbenzothiazole scaffold.                                                    |           |
| [ <sup>111</sup> In]DTPA-RP782 | atherosclerosis, inflammation | matrix metalloproteinase inhibitors | Could be used for molecular imaging of atherosclerosis, aneurysm, and monitoring distinctive MMP activities. Peptidomimetic vector; further pre-clinical and clinical studies are mandatory to assess its feasibility | [406-409] |

**Table S6.** Chemical structures of some of the most representative ligands and chelating agents for PET and/or SPECT radiopharmaceuticals.

| PET                                                                                 |                                                                                     |                                                                                       |
|-------------------------------------------------------------------------------------|-------------------------------------------------------------------------------------|---------------------------------------------------------------------------------------|
| 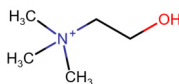 |  |  |
| <b>Choline</b>                                                                      | <b>Methionine</b>                                                                   | <b>FDOPA</b>                                                                          |
| <hr/>                                                                               |                                                                                     |                                                                                       |
|  |  |  |
| <b>4-nitromidazole</b>                                                              | <b>FDG</b>                                                                          | <b>Flumazenil</b>                                                                     |
| <hr/>                                                                               |                                                                                     |                                                                                       |
|  |  |  |
| <b>Desferrioxamine B</b>                                                            | <b>HBED-CC</b>                                                                      | <b>FAPI-04</b>                                                                        |
| PET and SPECT                                                                       |                                                                                     |                                                                                       |

## Supplementary Material

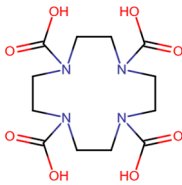

DOTA

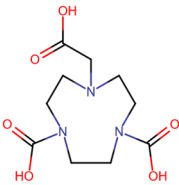

## NOTA

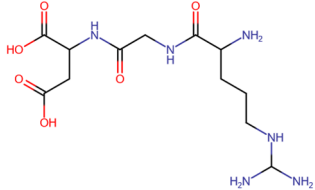

### RGD motif

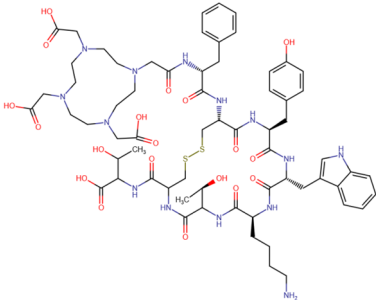

## DOTATATE

## SPECT

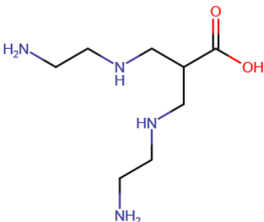

**6-carboxy- 1,4,8,11 – tetraazaundecane (N4)**

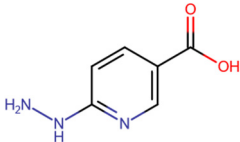

## Hydrazinonicotinamide acid
